# Supplementary material for: Maternal Concentrations of Perfluoroalkyl Substances and Fetal Markers of Metabolic Function and Birth Weight: The Maternal-Infant Research on Environmental Chemicals (MIREC) Study
Source: PubMed Central journal article supplement — Am J Epidemiol. 2017 Feb 1;185(3):185–93. doi: 10.1093/aje/kww213 (PMC5391709; doi:10.1093/aje/kww213), 2017-02-01
Supplement: kww213doddswebmaterialfinal.pdf [file kww213doddswebmaterialfinal.pdf]

## WEB APPENDIX

### *Bayesian Methods*

The model had an underlying linear regression model of the form  $Y_i = \beta_0 + \beta_1 X_{i1} + \beta_2 X_{i2} + \dots, n$ .

The hierarchical model was of the following form:

$$Y_i | \beta_j \sim N\left(\sum_{j=1}^k \beta_j X_{ij}, \sigma^2\right)$$
$$\beta \sim N(0, \Phi^2) \quad \Phi^2 \sim \text{Half-}N(0, 0.01)$$

Analysis in the Bayesian hierarchical model was run using OpenBUGS, version 322, and R, version 3.0.3 (R Foundation for Statistical Computing, Vienna, Austria). The R2OpenBUGS package was used in R to run OpenBUGS. The following OpenBUGS code was used.

```
# Linear regression
y[i] ~ dnorm(mu[i],tau.c)
mu[i] <- alpha + b[1]*x1[i] + b[2]*x2[i] + b[3]*x3[i]
+ b.par*par[i] + b.bmi*bmi[i] + b.inc*inc[i] + b.smok*smok[i] + b.age*age[i]
}
for (j in 1:J) {
b[j] ~ dnorm (0,phi) }
alpha ~ dnorm(0.0,0.01)
b.par ~ dnorm(0.0,0.01)
b.bmi ~ dnorm(0.0,0.01)
b.inc ~ dnorm(0.0,0.01)
b.smok ~ dnorm(0.0,0.01)
b.age ~ dnorm(0.0,0.01)
phi ~ dnorm(0,0.01)|(0, )
tau.c ~ dgamma(0.001,0.001)
sigma <- 1/sqrt(tau.c)
}
```

**Web Table 1.** Pearson Correlation Coefficients for Maternal log<sub>10</sub> PFAS Concentrations

|       | <b>PFOA</b> | <b>PFOS</b> | <b>PFHxS</b> |
|-------|-------------|-------------|--------------|
| PFOA  | 1           | 0.59        | 0.47         |
| PFOS  |             | 1           | 0.55         |
| PFHxS |             |             | 1            |

Abbreviations: PFAS, perfluoroalkyl substances; PFHxS, perfluorohexanesulfanoate;

PFOA, perfluorooctanoic acid; PFOS, perfluorooctanesulfonate.

**Web Figure 1.** Restricted cubic spline curve of the relationship between maternal PFOA concentrations (ng/mL) and birth weight z score.

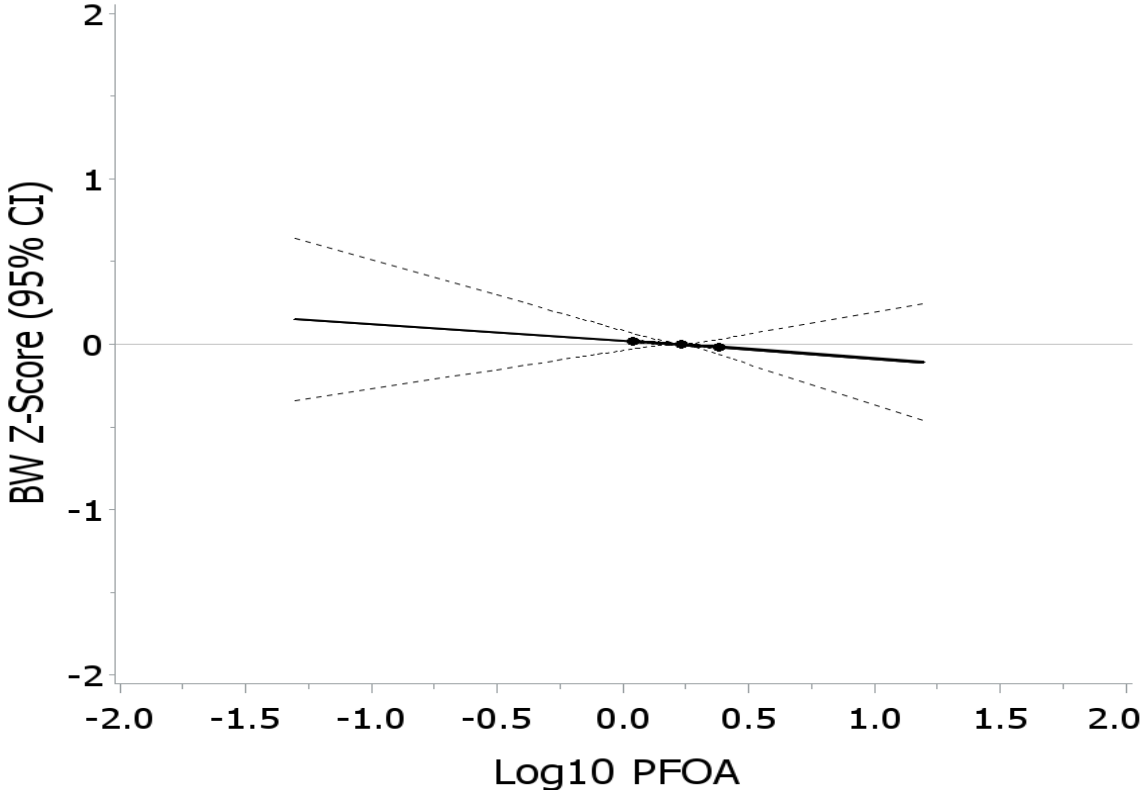

BW, birth weight; CrI, credible interval; PFOA, perfluorooctanoic acid.

**Web Table 2.** Linear Regression Estimates of Log<sub>10</sub> Perfluoroalkyl Substances (ng/mL) and Umbilical Cord Blood Log<sub>10</sub> Leptin (ng/mL), Log<sub>10</sub> Adiponectin (µg/mL), and Birth Weight z Score, MIREC Study, 2008–2011

|       | Leptin<br>(n = 1,176) |             |                       |             | Adiponectin<br>(n = 1,175) |             |                       |             | Birth Weight z Score<br>(n = 1,509) |             |                       |             |
|-------|-----------------------|-------------|-----------------------|-------------|----------------------------|-------------|-----------------------|-------------|-------------------------------------|-------------|-----------------------|-------------|
|       | Crude                 |             | Adjusted <sup>a</sup> |             | Crude                      |             | Adjusted <sup>a</sup> |             | Crude                               |             | Adjusted <sup>b</sup> |             |
|       | β                     | 95% CrI     | β                     | 95% CrI     | β                          | 95% CrI     | β                     | 95% CrI     | β                                   | 95% CrI     | β                     | 95% CrI     |
| PFOA  | 0.04                  | -0.11, 0.18 | -0.01                 | -0.15, 0.14 | 0.05                       | -0.03, 0.13 | 0.04                  | -0.05, 0.13 | -0.22                               | 0.45, 0.01  | -0.13                 | -0.39, 0.13 |
| PFOS  | -0.09                 | -0.25, 0.06 | -0.10                 | -0.24, 0.05 | -0.02                      | -0.11, 0.07 | -0.02                 | -0.11, 0.07 | 0.11                                | 0.14, 0.24  | 0.07                  | -0.18, 0.33 |
| PFHxS | 0.04                  | -0.06, 0.14 | 0.01                  | -0.08, 0.11 | -0.02                      | -0.08, 0.04 | -0.02                 | -0.08, 0.04 | 0.08                                | -0.14, 0.36 | 0.04                  | -0.13, 0.21 |

Abbreviations: CrI, credible interval; MIREC, Maternal-Infant Research on Environmental Contaminants; PFAS, perfluoroalkyl substances; PFHxS, perfluorohexanesulfanoate; PFOA, perfluorooctanoic acid; PFOS, perfluorooctanesulfonate.

<sup>a</sup> Adjusted for maternal age, prepregnancy body mass index, sex, and parity.

<sup>b</sup> Adjusted for maternal age, prepregnancy body mass index, parity, household income, and smoking; all 3 PFAS were entered into one model.
